# Supplementary material for: Dating of the GV7 East Antarctic ice core by high-resolution chemical records and focus on the accumulation rate variability in the last millennium
Source: Copernicus journal article supplement (doi:10.5194/cp-17-2073-2021), 2021-10-13
Supplement: Supplementary file 1 [file cp-17-2073-2021-supplement.pdf]

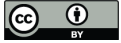

*Supplement of*

**Dating of the GV7 East Antarctic ice core by high-resolution chemical records and focus on the accumulation rate variability in the last millennium**

**Raffaello Nardin et al.**

*Correspondence to:* Mirko Severi ([mirko.severi@unifi.it](mailto:mirko.severi@unifi.it))

The copyright of individual parts of the supplement might differ from the article licence.

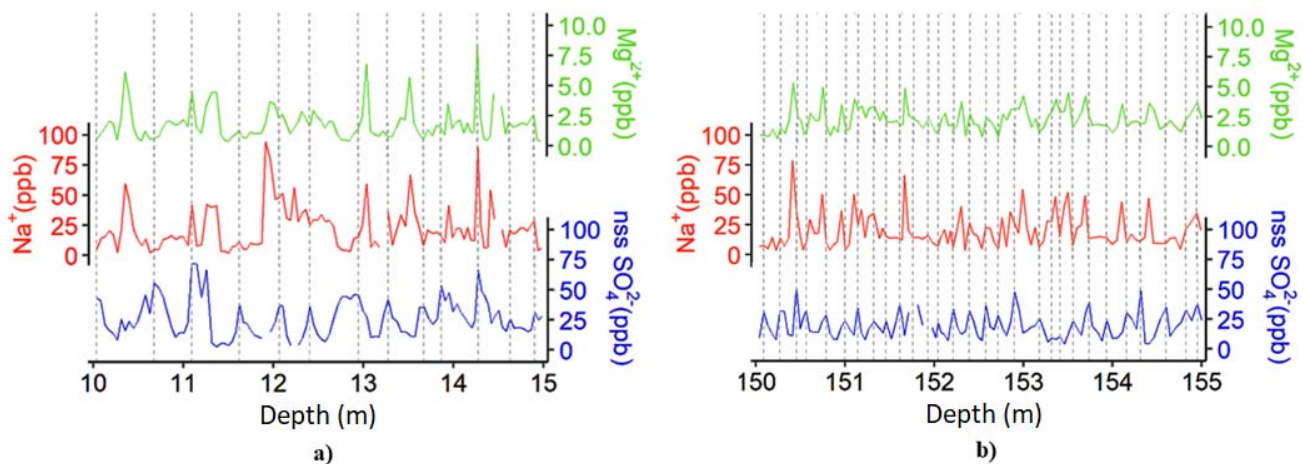

Figure S1: Example of annual layering for a shallow (a) and a deep (b) section of the GV7(B) ice core as depicted in the  $\text{nssSO}_4^{2-}$  (blue),  $\text{Na}^+$  (red) and  $\text{Mg}^{2+}$  (green) profiles. Dashed grey lines represent the yearly layers.

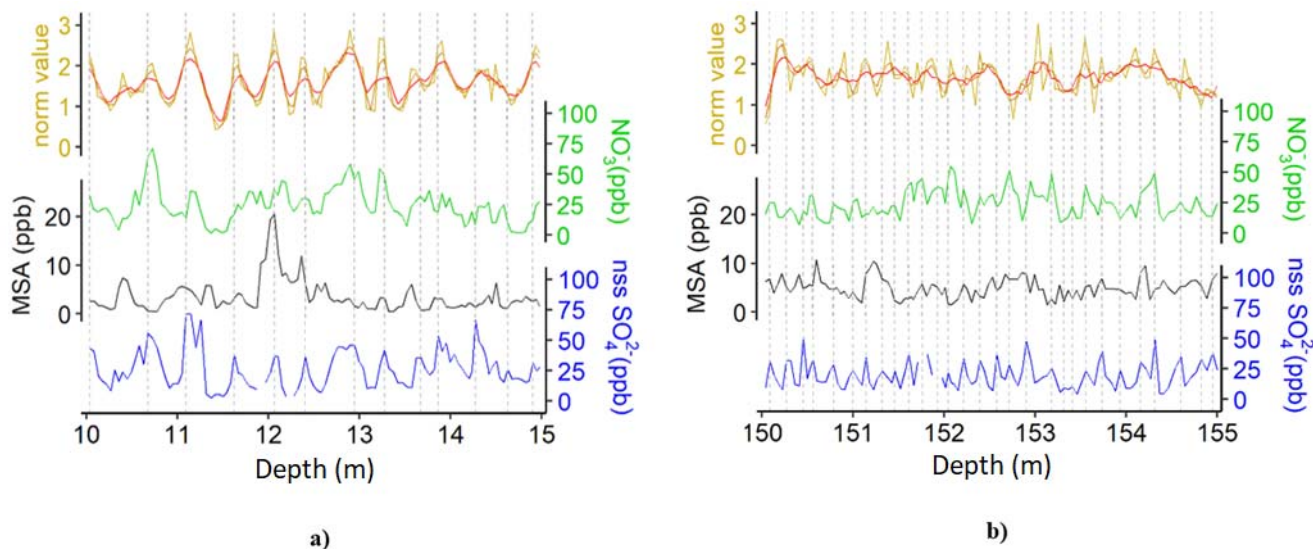

Figure S2: Example of annual layering for a shallow (a) and a deep (b) section of the GV7(B) ice core.  $\text{nssSO}_4^{2-}$  (blue), MSA (grey) and  $\text{NO}_3^-$  (green) profiles represent the raw concentration data. The light and dark orange lines on the top refer to sum of normalized values of the three single parameters and to their running average smoothing. Dashed grey lines represent the yearly layers.

5

10

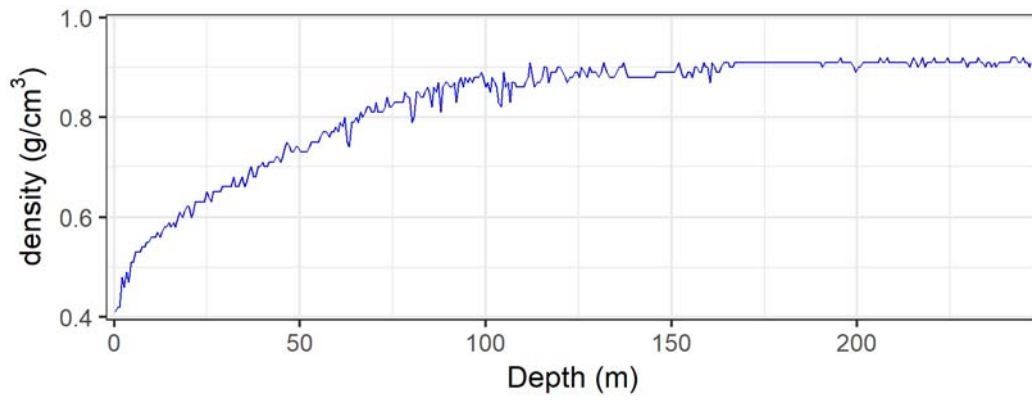

**Figure S3: GV7(B) ice core density profile as measured in the field during the drilling operations.**
